# Supplementary material
Source: PubMed Central journal article supplement (PMC5341505)
Supplement: IMM-150-64-s002.pdf [file IMM-150-64-s002.pdf]

**Supplemental table 1 Fraction of hematopoietic cells used in this study**

| Cell population                                                | Abbreviation | Fraction                                     | Source                                         |
|----------------------------------------------------------------|--------------|----------------------------------------------|------------------------------------------------|
| hematopoietic stem cell and multipotent progenitor             | HSC+MPP      | lineage- Sca-1+ c-Kit+                       | bone marrow                                    |
| common myeloid progenitor                                      | CMP          | lineage- Sca-1- c-Kit+ CD34+ FcγRII/III low  | bone marrow                                    |
| granulocyte / monocyte progenitor                              | GMP          | lineage- Sca-1- c-Kit+ CD34+ FcγRII/III high | bone marrow                                    |
| megakaryocyte / erythrocyte progenitor                         | MEP          | lineage- Sca-1- c-Kit+ CD34- FcγRII/III low  | bone marrow                                    |
| eosinophil progenitor                                          | EoP          | lineage- Sca-1- CD34+ c-Kit low IL-5Rα+      | bone marrow                                    |
| basophil progenitor                                            | BaP          | lineage- CD34+ c-Kit-/low FcεRIα+            | bone marrow                                    |
| mast cell progenitor (in vitro induced)                        | MCP          | lineage- FcεRIα low c-Kit low                | day4 GMP progeny cultured with IL-3 (20ng/ml)  |
| eosinophil                                                     | -            | lymphoid markers- FcεRIα- Gr-1 low/+ CCR3+   | spleen                                         |
| eosinophil (in vitro induced, for multiplex cytokine analysis) | -            | -                                            | day7 EoP progeny cultured with IL-5 (20ng/ml)  |
| basophil                                                       | -            | lymphoid markers- FcεRIα+ DX5+               | spleen                                         |
| mast cell                                                      | -            | lymphoid markers- FcεRIα+ c-Kit+             | peritoneal cavity                              |
| mast cell (in vitro induced, for multiplex cytokine analysis)  | -            | Gr-1- FcεRIα+ c-Kit+                         | day14 GMP progeny cultured with IL-3 (20ng/ml) |
| neutrophil                                                     | -            | lymphoid markers- FcεRIα- Gr-1+ CCR3-        | spleen                                         |
| monocyte                                                       | -            | lymphoid markers- FcεRIα- Gr-1 low CCR3-     | spleen                                         |
| conventional dendritic cell                                    | cDC          | CD3- CD4- CD8- CD19- NK1.1- B220- CD11c+     | spleen                                         |
| common lymphoid progenitor                                     | CLP          | lineage- IL-7Rα+ Sca-1 low c-Kit low         | bone marrow                                    |
| pro-B cell                                                     | -            | CD3- CD4- CD8- Gr-1- IgM- B220+ CD43+ CD19+  | bone marrow                                    |
| pre-B cell                                                     | -            | CD3- CD4- CD8- Gr-1- IgM- B220+ CD43- CD19+  | bone marrow                                    |
| double negative thymocyte                                      | DN           | CD3- CD4- CD8- CD19- NK1.1- Gr-1-            | thymus                                         |
| double positive thymocyte                                      | DP           | CD3- CD4+ CD8+ CD19- NK1.1- Gr-1-            | thymus                                         |
| CD4 single positive thymocyte                                  | CD4 SP       | CD3- CD4+ CD8- CD19- NK1.1- Gr-1-            | thymus                                         |
| CD8 single positive thymocyte                                  | CD8 SP       | CD3- CD4- CD8+ CD19- NK1.1- Gr-1-            | thymus                                         |
| CD4+ T cell                                                    | -            | CD3+ CD4+ CD8-                               | spleen                                         |
| CD8+ T cell                                                    | -            | CD3+ CD4- CD8+                               | spleen                                         |
| B cell                                                         | -            | CD3- CD19+                                   | spleen                                         |
| NK cell                                                        | -            | CD3- CD19- NK1.1+ Gr-1-                      | spleen                                         |
| plasmacytoid dendritic cell                                    | pDC          | CD3- CD4- CD8- CD19- NK1.1- B220+ CD11c low  | spleen                                         |
| type 2 innate lymphoid cell                                    | ILC2         | lineage- IL-7Rα+ Sca-1+ c-Kit+ ST2+          | mesenteric lymph node                          |

lineage-: CD3-, CD4-, CD8-, CD19-, B220-, NK1.1-, Gr-1-, Ter119-

lymphoid markers-: CD3-, CD4-, CD8-, CD19-, B220-, NK1.1-
